# Supplementary material
Source: Springer Nature journal article supplement (https://www.springermedizin.de/resource/supplementary/13054_2011_542_MOESM3_ESM.pdf/9708766)
Supplement: MOESM3 [file 9708766]

EVLWI [mL/kg]

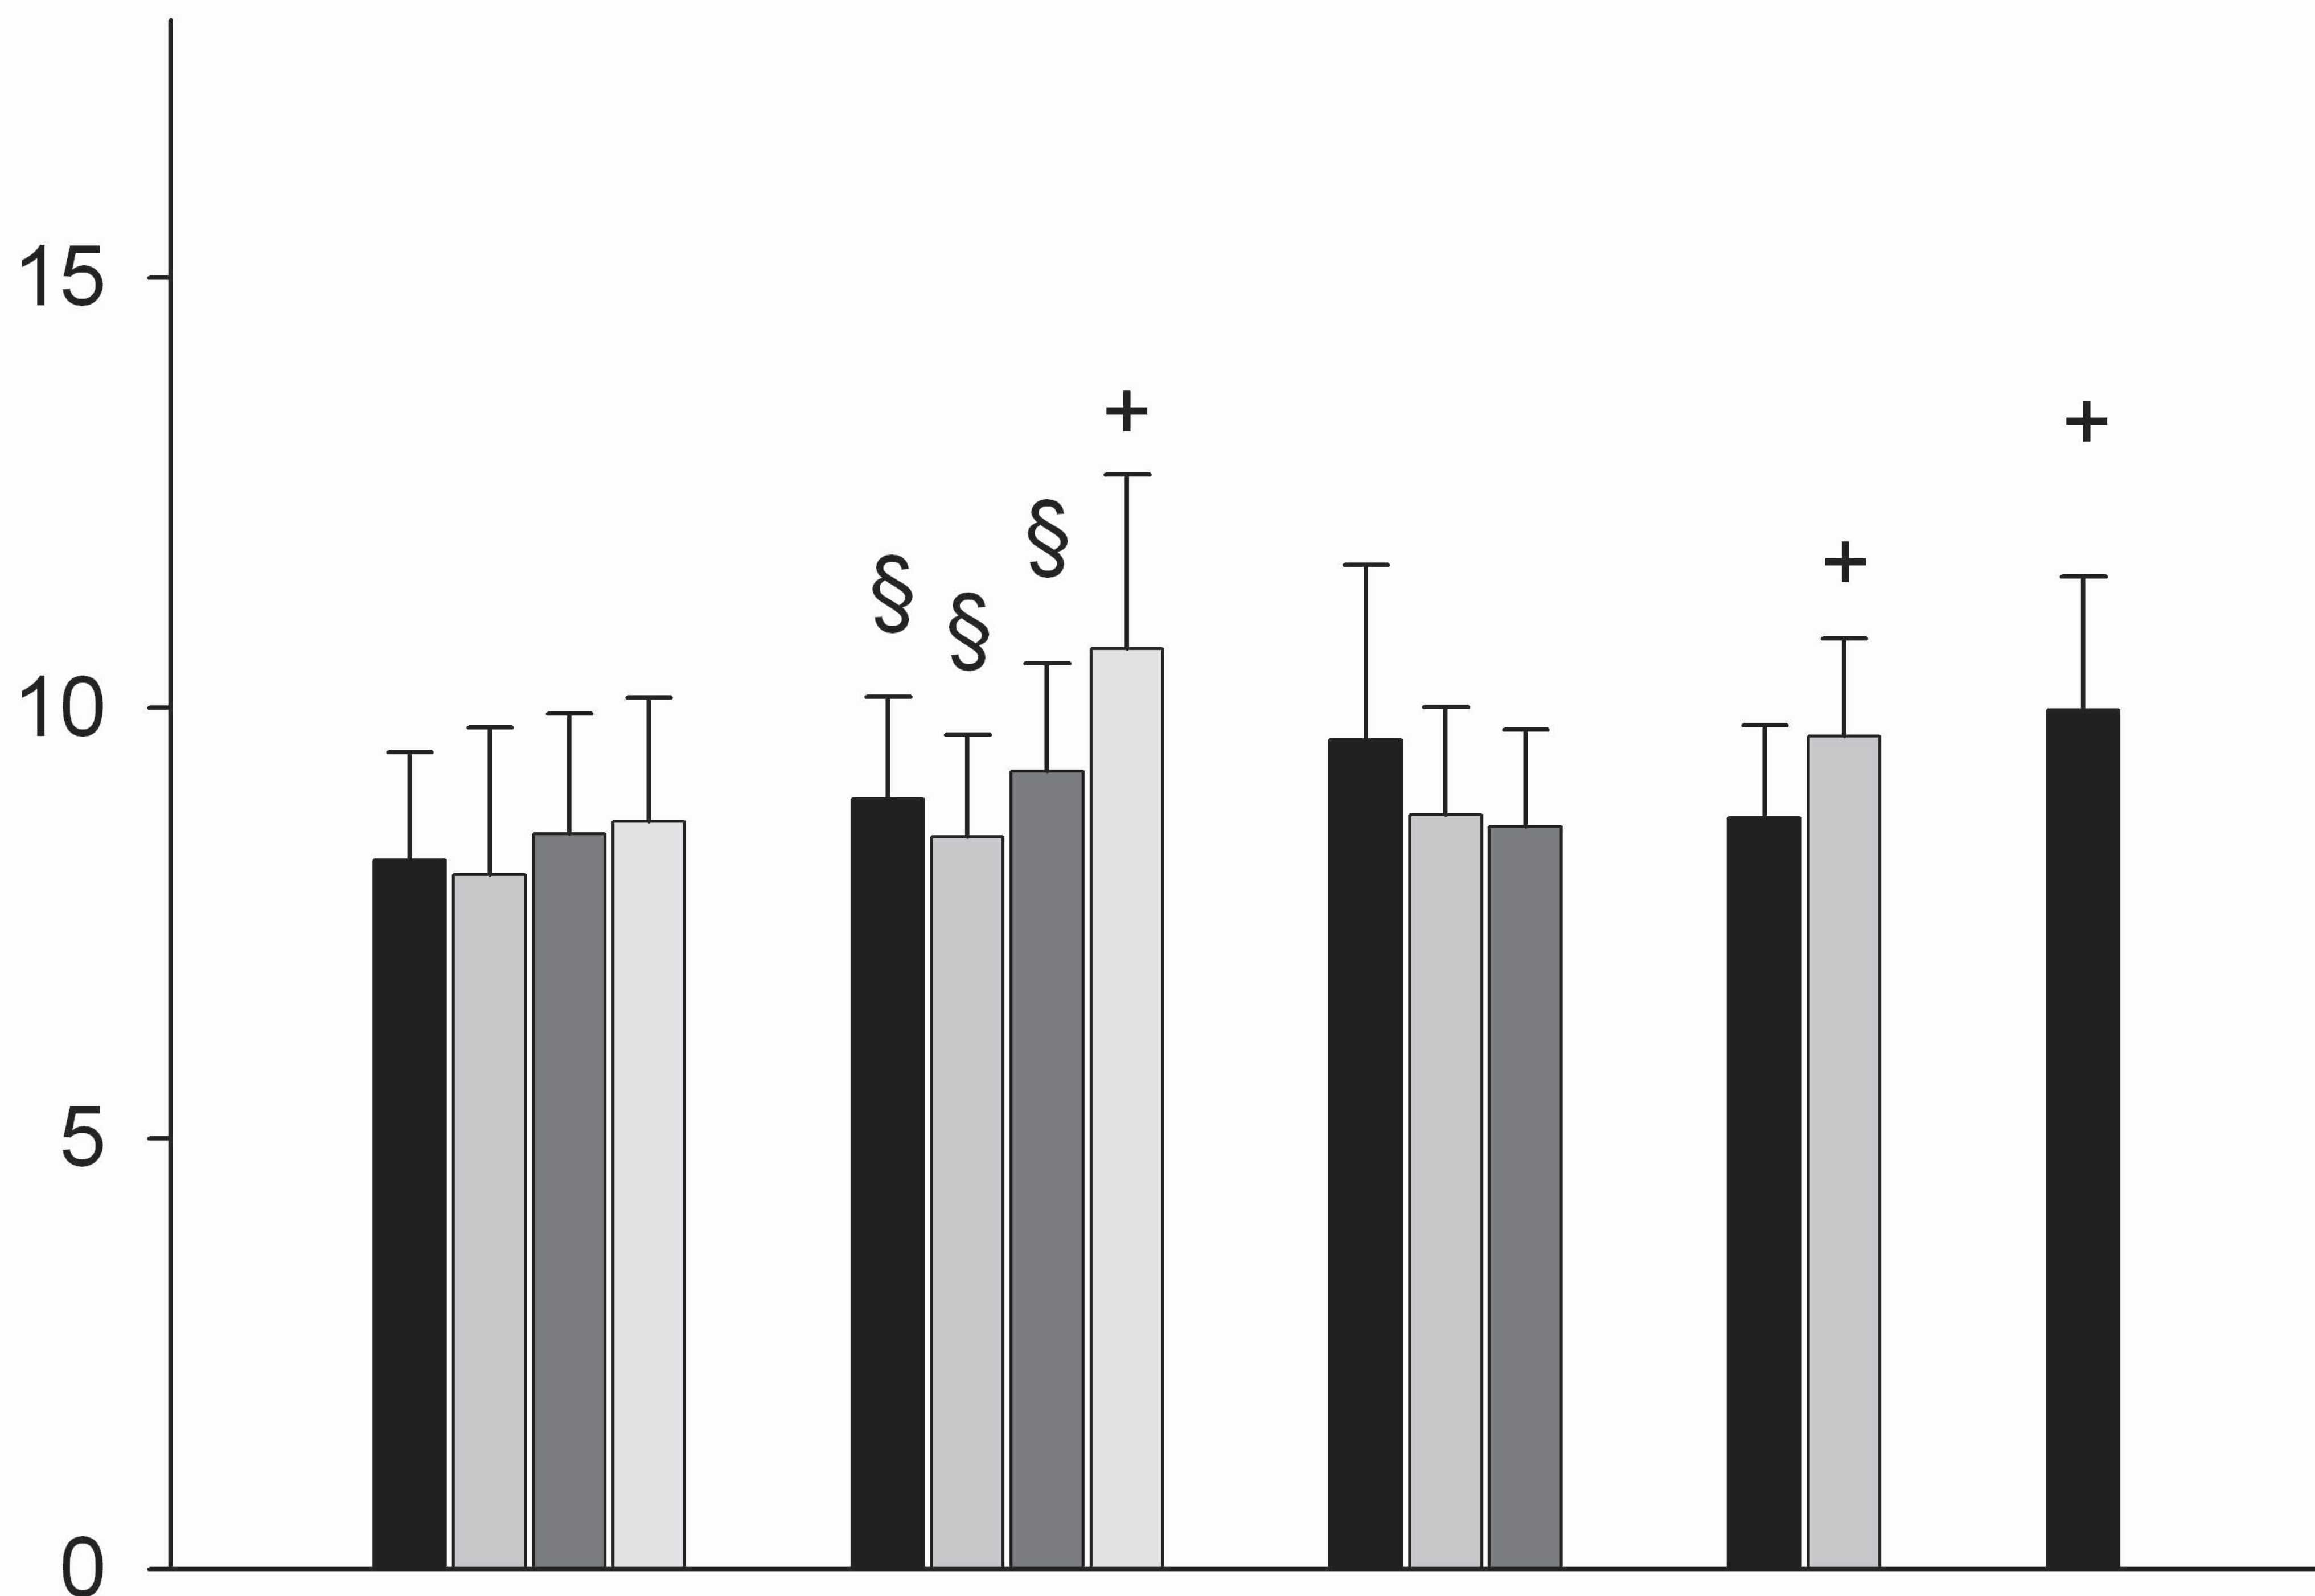

Baseline

Hb 3.7g/dL

Hb 3.0g/dL

Hb 2.7g/dL

Hb 2.1g/dL

■ TS-group (Hb<sub>crit</sub> 2.1±0.4 g/dL)

■ GEL-group (Hb<sub>crit</sub> 2.7±0.6 g/dL)

■ HS-group (Hb<sub>crit</sub> 3.0±0.6 g/dL)

■ RS-group (Hb<sub>crit</sub> 3.7±0.6 g/dL)
